1  
2  
3  
4  
5  
6  
7  
8  
9  
10  
11  
12  
13  
14  
15  
16  
17  
18  
19  
20  
21  
22  
23  
24  
25

# **Identification of residue inversions in large phylogenies of duplicated proteins**

Stefano Pascarelli<sup>1</sup>, Paola Laurino<sup>1\*</sup>

<sup>1</sup> Protein Engineering and Evolution Unit, Okinawa Institute of Science and Technology Graduate University, Onna, Okinawa 904-0495 Japan.

\* Corresponding author

E-mail: [paola.laurino@oist.jp](mailto:paola.laurino@oist.jp)

## 26 **Abstract**

27 Connecting protein sequence to function is becoming increasingly relevant since high-  
28 throughput sequencing studies accumulate large amounts of genomic data. In order to go  
29 beyond the existing database annotation, it is fundamental to understand the mechanisms  
30 underlying functional inheritance and divergence. If the homology relationship between  
31 proteins is known, can we determine whether the function diverged?

32 In this work, we analyze different possibilities of protein sequence evolution after gene  
33 duplication and identify “residue inversions”, i.e., sites where the relationship between the  
34 ancestry and the functional signal is decoupled. Residues in these sites are masked from being  
35 recognized by other prediction tools. Still, they play a role in functional divergence and could  
36 indicate a shift in protein function. We develop a method to specifically recognize residue  
37 inversions in a phylogeny and test it on real and simulated datasets. In a dataset built from the  
38 Epidermal Growth Factor Receptor (EGFR) sequences found in 88 fish species, we identify 19  
39 positions that went through inversion after gene duplication, mostly located at the ligand-  
40 binding extracellular domain.

41 Our work uncovers a rare event of protein divergence that has direct implications in protein  
42 functional annotation and sequence evolution as a whole. The developed method is optimized  
43 to work with large protein datasets and can be readily included in a targeted protein analysis  
44 pipeline.

45

46

## 47 **Background**

48 Proteins perform their function either through protein-protein interactions, protein-ligand  
49 interactions, or catalyzing chemical reactions. At the molecular level, residues of a protein  
50 interact with a counterpart, namely a ligand (small molecule, protein, DNA/RNA, etc.). Herein

51 we define such interacting residues as functional residues. The importance of predicting  
52 functional residues in a protein is evident as these residues can contribute to designing new  
53 functions, switching specificities, defining protein families and subfamilies, or identifying the  
54 occurrence of a functional innovation (e.g., a change of ligand specificity). Crystal structures  
55 in which the protein of interest was co-crystallized with its ligand, can readily identify  
56 functional residues. However, when the structure is not available, the identification of  
57 functional residues is not trivial. Previous attempts used the evolutionary information found in  
58 protein sequences and their homologs (1-3), approaches now facilitated by the global-scale  
59 genome sequencing effort driven by the development of high-throughput sequencing  
60 technologies. The prediction of functional residues by such methods is hampered by the  
61 presence of neutral mutations, namely amino acid substitutions that are neither beneficial nor  
62 disadvantageous (4). Non-synonymous neutral mutations are on average 10 times more  
63 abundant than advantageous mutations (5). While neutral mutations help to determine the  
64 phylogenetic position of a protein, mutations of functional residues are a signal of functional  
65 shifts that might occur independently of the phylogeny. When the relationship between  
66 phylogeny and function is decoupled, neutral mutations may mislead homology-based  
67 prediction methods, which are the most common way of functional prediction (6).

68 An event that often decouples the phylogenetic and functional signal is gene duplication. After  
69 gene duplication, two proteins follow a semi-independent evolution. For example, before  
70 diverging, the two duplicates may influence each other by gene conversion (7) or homomeric-  
71 heteromeric interactions (8), and they tend to diversify in the expression profile (9, 10). Gene  
72 duplication is prevalent in all domains of life (11), and often the duplicated proteins are  
73 reported to go through functional diversification (12). For example, in an event termed “sub-  
74 functionalization”, a protein with multiple functions (e.g., cellular receptors binding multiple  
75 ligands) might split its functions between the two gene copies after duplication. Previously,

76 McClintock *et al.* showed that, in zebrafish HOX genes, the subset of functions inherited by  
77 the duplicated copies is different between fish and mouse – a phenomenon named “function  
78 shuffling” (13). In cases alike, the phylogenetic signal is misleading when used to predict the  
79 function of a “shuffled” orthologous protein. However, if the functional divergence is correctly  
80 identified, it allows to highlight the functional residues responsible for this transition, with  
81 reduced noise from the neutral variants. In this work, we address the identification of protein  
82 functional residues that are mutated during this type of functional rearrangement.

83

84 Residues responsible for a change of function within a protein family are usually called  
85 Specificity Determining Sites (SDS). SDS can be predicted by multiple methods (14). SDS  
86 prediction methods use the Multiple Sequence Alignment (MSA) or the 3D structure of the  
87 protein of interest to calculate a score based on conservation (15-23), evolutionary rate (24-  
88 26), or 3D structure properties (27). Most of these approaches require the user to provide the  
89 correct groupings of the homologous proteins. When this information is missing, the groupings  
90 are made according to the ortholog classification obtained by manual or automatic partitioning  
91 methods (28-31). However, the SDS predictions in automatically partitioned orthologs showed  
92 a lower sensitivity (32), demonstrating that an incorrect grouping negatively influences the  
93 prediction. The grouping usually follows the ortholog conjecture, namely that orthologs are  
94 more conserved than paralogs (33, 34). When this is not true, the SDS prediction is hampered.  
95 Therefore, the power to predict functional residues is limited by our ability to track protein  
96 function on the phylogenetic tree when it is not linearly inherited by orthologs. In our work we  
97 address this problem by identifying a signal of functional transition that might prove to be  
98 useful when annotating orthologs.

99

100 EGFR (Epidermal Growth Factor Receptor) is a tyrosine-kinase receptor that activates multiple  
101 signaling pathways after binding one of the seven EGFR ligands (35). EGFR is broadly  
102 expressed (36) and plays a crucial role in several aspects of organismal development and  
103 homeostasis like cellular growth, differentiation, metabolism, and motility (37). In fish, two  
104 copies of EGFR were kept after the Teleost-Specific Genome Duplication (TSGD) event that  
105 occurred about 350 mya in the actinopterygian lineage (38, 39). Lorin *et al.* showed that both  
106 copies of EGFR might have been retained because they are involved in the complex process of  
107 skin pigmentation (40), which is under high evolutionary pressure in most fish. Furthermore,  
108 the extracellular domain of fish EGFR, responsible for binding multiple ligands, likely went  
109 through sub-functionalization (41). For these reasons, EGFR constitutes a perfect model to  
110 study uneven functional inheritance events.

111

112 In this work, we observe a scenario where the function of a protein is not linearly inherited  
113 across orthologs, and we identify the functional residues responsible for the shift of functions.  
114 Our goal is to develop an algorithm that highlights the signature of a putative inversion of  
115 function, as could be an inversion of residues between the paralogs within the same species.  
116 First, we obtain a simple theoretical model that describes the likelihood of a residue inversion  
117 in comparison to other outcomes. Then, based on the model, we develop an algorithm that  
118 identifies residue inversions in a phylogeny, and we apply it in the context of fish EGFR  
119 duplication. Finally, we validate the results using statistical scores and simulated evolution.  
120 Our analysis shows a new way to investigate an important and understudied outcome of gene  
121 duplication.

122

## 123 **Results and Discussions**

124

## 125 Theoretical model for residue inversion identification

126 First, we constructed a simplified model to describe the evolution of a residue through a protein  
127 phylogeny after gene duplication and speciation. In the model, a tree branch (b1–b6) could be  
128 either mutation (1) or no-mutation (0) state, while a leaf node (Xa, Ya, Xb, Yb) has the possible  
129 states 0, 1, or 2 depending on the number of mutations in the preceding branches (Figure 1A).  
130 A configuration of six branch states univocally leads to a configuration of four leaf nodes. The  
131 model uses two branch length parameters, pre-speciation (t1) and post-speciation (t2), to  
132 calculate the probability of each of the 64 branch configurations. Using the model and a set of  
133 matching rules between the leaves (Figure 1B), we assessed the probability of seven  
134 categories/scenarios of configurations (Figure 1C): *Conserved*, all four residues match; *Type 1*  
135 *divergence*, residues match in only one paralog group; *Type 2 divergence*, residues match per  
136 paralog group but not per species; *Recent divergence*, all residues match except for one leaf  
137 node; *Inversion*, residues of opposite paralog group match but not per species; *Species-specific*  
138 *adaptation*, residues match per species, but not per paralog group; and *Non-conserved*,  
139 collecting all events that do not fall in any of the other categories. We used the following  
140 formula to calculate the probability of each category:

$$141 \quad P_{cat} = \sum_s^N P_{conf} * P_{(cat|conf)}$$

142 Where N are the 64 configurations of branch states, the probability  $P_{conf}$  of the branch  
143 configuration is given by the model (Figure S4), and the conditional probability for the  
144 category  $P_{(cat|conf)}$  is determined by the category's matching rules.

145

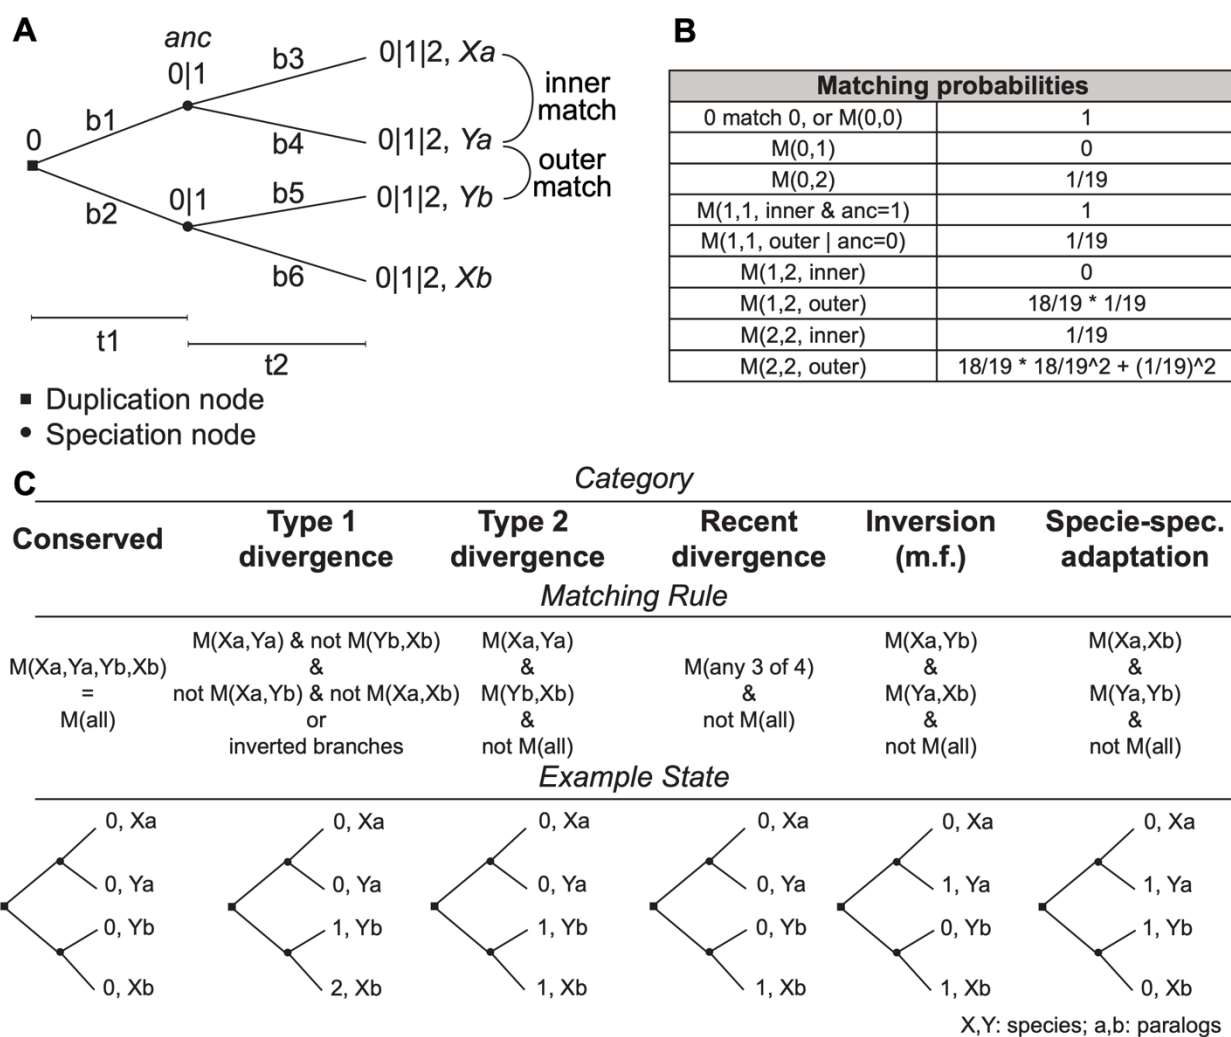

146

147 **Figure 1. Theoretical model of the evolution of protein residue after gene duplication. (A)**

148 The structure of the phylogenetic tree that the model is based on. The branch lengths  $t_1$  and  $t_2$

149 are used to determine the probability of a mutation on each branch  $b_1$  to  $b_6$ . A leaf node can

150 be found in states 0, 1, or 2 depending on the number of mutations in the preceding branches.

151 An inner match is defined to be a match between orthologs (Xa to Ya, or Xb to Yb), while an

152 outer match is any other match. The probability for a match between two states is given by the

153 table in **(B)** and represents the underlying transition to any of the 20 amino acids. **(C)**

154 Description of the categories. The categories represent a biologically interpretable situation,

155 suggested by their name. Given a certain outcome configuration of states, it is possible to

156 calculate the probability of observing a certain category by using the matching rule. The

157 “Example State” section shows the leaf configuration that gives the highest probability of  
158 observing the category described.

159

160 Next, we tested the probability of each category at varying branch lengths (Figure 2A). As  
161 expected, short branch lengths lead to a high probability of conserved residues, and long branch  
162 lengths lead to non-conserved residues. When the pre-speciation branch length is the longest  
163 of the two, we observe a high probability of Type 1 and Type 2 divergence. Whereas, when  
164 the post-speciation branch length is the longest, we observe a high probability of recent  
165 divergence. Interestingly, for any branch length combination, the two categories of inversion  
166 and species-specific adaptation have less than a 1% chance of appearing. From this analysis,  
167 we expect to rarely find these two events in real data.



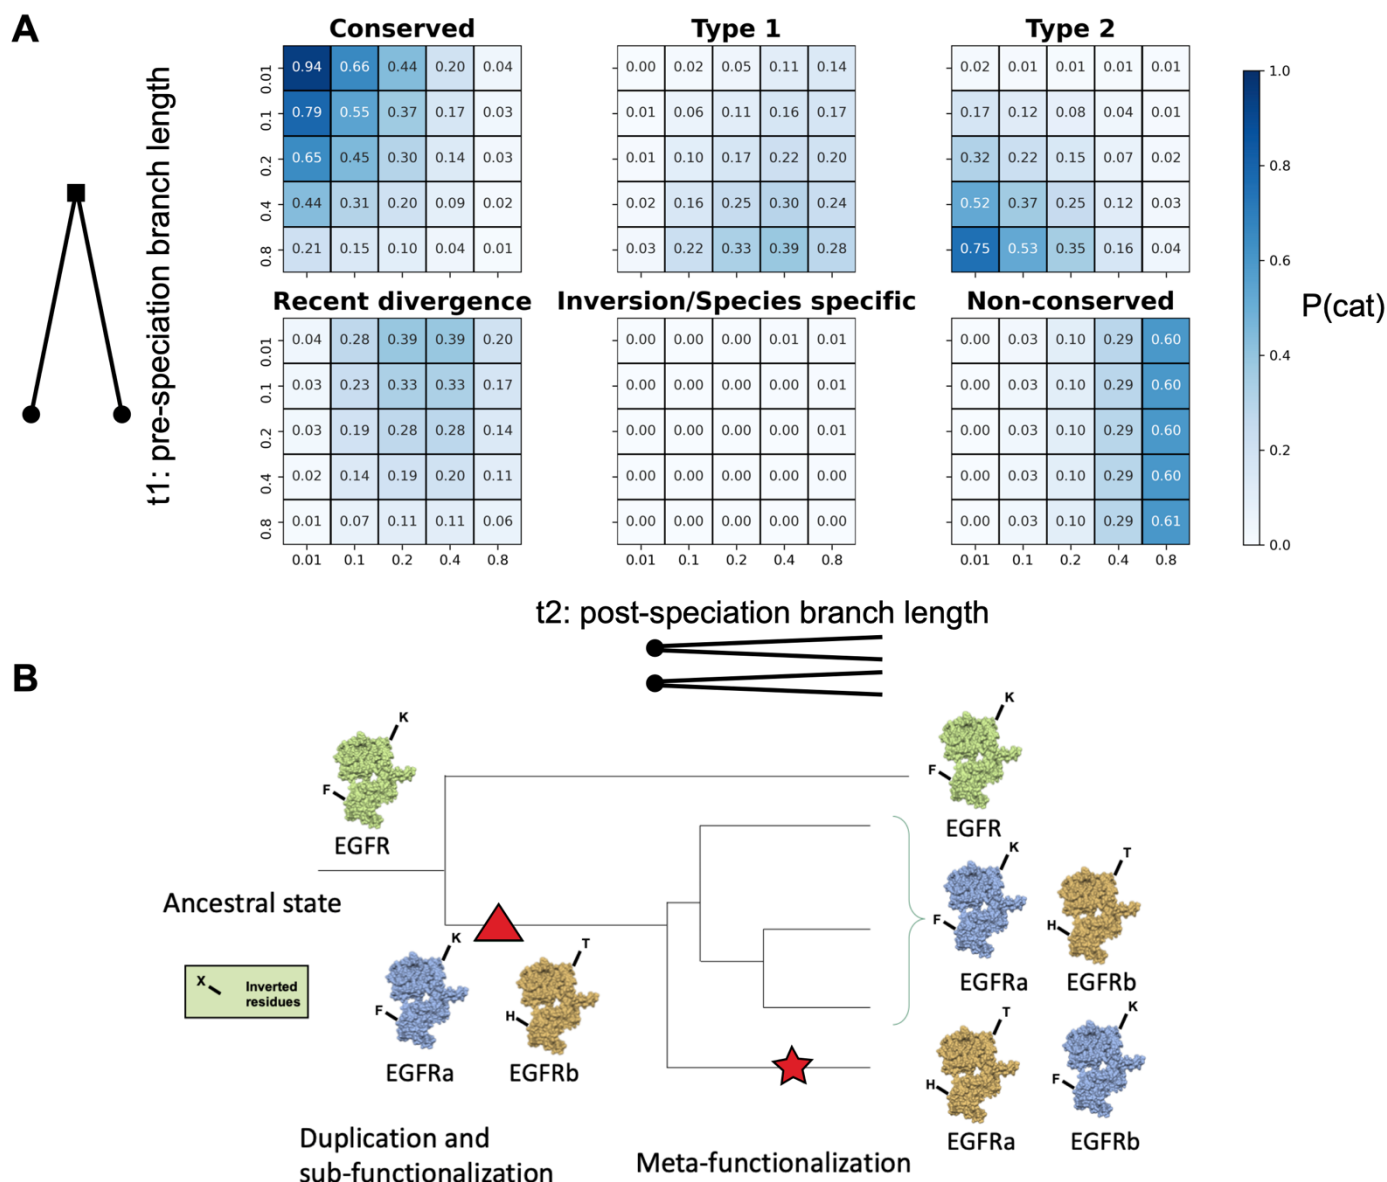

177 From the previous results, residues inversions should not be recurrent in a phylogeny. Thus, an  
178 unlikely high presence of inverted residues may show that: 1) these residues are following a  
179 selective pressure directly related to the paralog function that, for a particular subgroup of  
180 species, is opposite and complementary to the other species; or 2) these residues act as  
181 compensatory mutations. A recurrent residue inversion could be the proxy of a functional  
182 rearrangement between the paralogs within a clade. A rearrangement of functions is facilitated  
183 in, but not limited to the Innovation Amplification Divergence (IAD) model of duplicates  
184 divergence (42), where paralogs partially retain their secondary functions. We describe this  
185 subgroup-specific functional inversion event as a possible outcome after the sub-  
186 functionalization of a duplicated gene and we suggest the name “meta-functionalization” from  
187 the Greek word “metathesis”, namely “put in a different order” (Figure 2B).

188

### 189 **Algorithm for the identification of residue inversions**

190 We developed an algorithm to identify the events of inversion in a protein phylogeny using a  
191 multiple sequence alignment (MSA) and a phylogenetic tree. The algorithm was implemented  
192 as a python package named DIRphy, for the Detection of Inverted Residues in a phylogeny.  
193 DIRphy splits the protein sequences of the MSA into four groups according to the organism  
194 and orthology annotations, which can be either provided by the user or automatically done  
195 using a tree distance parameter. Based on the matching probabilities of the previous theoretical  
196 model, DIRphy calculates a score for each event of “Inversion” and “Species-specific  
197 adaptation”, representing its probability to occur (see methods for details). However, for this  
198 paper, we will focus only on the inversion events. The output of DIRphy is a list of positions  
199 above a defined threshold. When the organism grouping is manually selected, the script  
200 calculates both the observed and the expected probability of inversion between the specified  
201 groups in the given tree. Otherwise, when the organism grouping is not specified, the output

202 table shows the observed probability of residue inversion given by the grouping that has the  
203 highest probability in that position. In the current version of DIRphy, only a binary paralog  
204 classification is allowed. DIRphy is released as an open-source project in Github:  
205 <https://github.com/OISTpasca/protein-inversions>

206

## 207 **Construction of a fish EGFR dataset and identification of residue inversions**

208 We tested DIRphy in the phylogenetic tree of the Epidermal Growth Factor Receptor (EGFR)  
209 in the fish lineage. First, we filtered 88 fish genomes (taxon 41665) from the European  
210 Nucleotide Archive (ENA) (43) to obtain a dataset of 167 fish EGFR protein sequences. The  
211 dataset included all high-quality (N50 > 1Mb) teleost genomes plus one outgroup before the  
212 TSGD (spotted gar). From the phylogenetic analysis of this dataset (Supplementary figure 1),  
213 three clear duplication events can be observed. The first, most ancient duplication coincided  
214 with the TSGD, around the time of the split with gars (~350 mya), and resulted in the separation  
215 of the two copies: EGFRa and EGFRb. Two more copies were found in most salmonids,  
216 corresponding to the salmon-specific whole-genome duplication around ~80 mya (44), and one  
217 more copy in goldfish, possibly due to the carp-specific whole genome duplication about ~10  
218 mya (45). The longer branch lengths of EGFRb (Mann-Whitney test, p-val: 2.305e-11) indicate  
219 that EGFRb is evolving more rapidly than its counterpart. Furthermore, the EGFRb gene was  
220 more commonly lost. Out of 15 gene loss events, only one species lost EGFRa (*S grahami*),  
221 while 14 species lost EGFRb.

222

223 Next, we tested the previously computed phylogeny and MSA of fish EGFR for residue  
224 inversions using DIRphy. We decided to compare the Cypriniformes clade with the other  
225 teleosts because of the high coverage of genomes in both groups, and a sufficiently long  
226 separation between the two groups to allow functional divergence on the protein sequence

227 (Figure 3A). We observed a distribution of the scores that resembles an extreme-value  
228 distribution, with most of them below 0.01 (Figure 3B). Using the theoretical model, we  
229 calculated that the expected value for the probability of residue inversions in the same tree is  
230 0.002, much lower than the score of the 99th percentile of 0.16. This percentile value was used  
231 as a threshold to select eight sites, the majority of which (six) were from the EGFR extracellular  
232 domain. We highlighted the positions of the six sites on the 3D structure of EGFRa and EGFRb  
233 extracellular domain from a representative Cypriniformes (*S. anshuiensis*), modeled using the  
234 human structure template (Figure 3C). Of the six selected positions, only one (MSA pos 520)  
235 was found at the ligand-binding pocket interface. Pos 520 corresponds to Phe-357 in hEGFR.  
236 Previous studies showed that the hydrophobic interaction between Phe-357 and Tyr-13 in the  
237 ligand hEGF is determinant for the binding (46). In the fish clade *Xiphophorus*, the observed  
238 change between Phe and His at this position is considered to be the determinant cause of the  
239 different responses of EGFRa and EGFRb after ligand stimulation (47). Out of the six positions  
240 in the extra-cellular domain, two showed a conservative substitution (Figure 3D). MSA  
241 position 506 contains hydrophobic and aliphatic amino acids (Ile or Val), while position 491  
242 shows a small and uncharged amino acid (Ser or Thr). All other positions exhibited a shift of  
243 amino acid physicochemical properties. These results show that DIRphy can identify inverted  
244 residues in a protein duplication phylogeny, regardless of the amino acid substitution type.

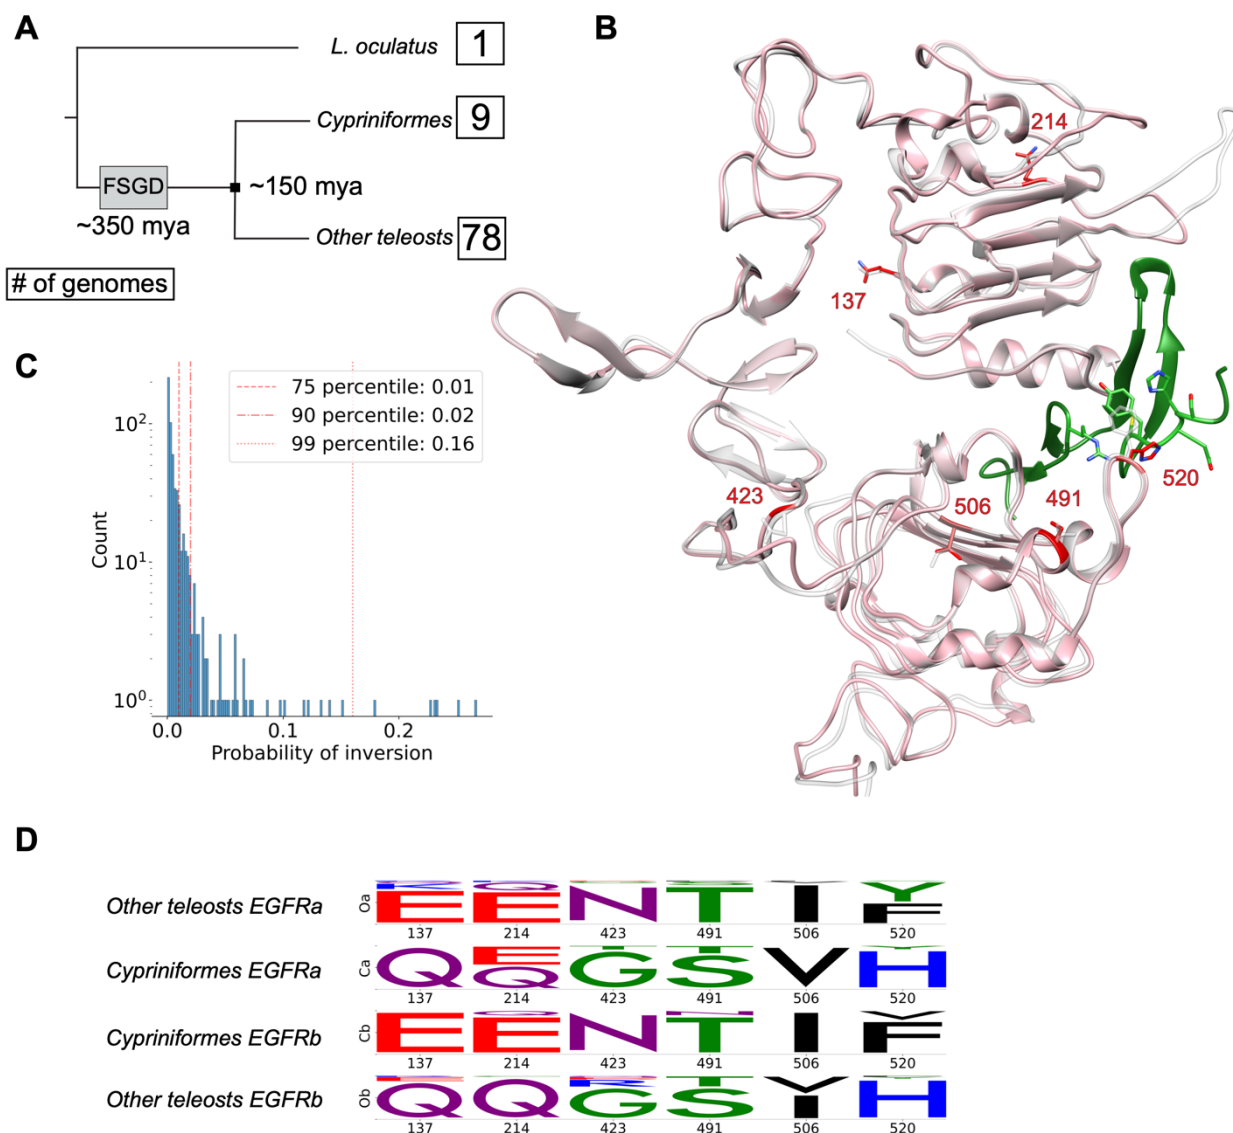

245

246 **Figure 3. Inverted residues in fish EGFR.** (A) Schematic representation of the fish dataset

247 phylogeny. The dates (mya: million years ago) indicate the time of the Fish Specific whole

248 Genome Duplication (FSGD) and the separation of Cypriniformes fish to all other teleost fish.

249 The number in the boxes represents how many genomes are in the dataset for that group. (B)

250 3D model superposition of *S. anshuensis* EGFRa (pink) and EGFRb (white), generated by

251 homology using human EGFR as a template (1IVO) (48). The inverted residues have been

252 highlighted in red. The ligand EGF (green) was taken from the human model after superposing

253 the receptors. (C) DIRphy score distribution. The residue inversion probability score was

254 calculated for each site in the MSA that has less than 60% gaps. The top 1% of sites were  
255 further characterized. **(D)** Logo representation of the four sub alignments (two species groups,  
256 two protein copies) in the inverted residue sites. The logo represents the normalized amino acid  
257 count per column and was obtained using the python package Logomaker (49).

258

### 259 **Score validation by simulated evolution**

260 We statistically validated the score observed in the fish EGFR data using a simulated evolution  
261 experiment. In this simulation, random starting amino acids are run through a phylogenetic tree  
262 that has the same topology as the previously computed fish EGFR tree. The simulation used  
263 the same evolutionary model of the fish EGFR tree to output a MSA as a result. Compared to  
264 the fish EGFR MSA, the simulated evolution MSA showed on average lower DIRphy scores  
265 while having a similar shape of the score distribution (Figure 4A). No specific amino acid was  
266 found to have high scores. Interestingly, the three residues involved in the interaction in  
267 position 520 (His, Tyr, and, except for one site, Phe) failed to produce any score higher than  
268 0.05 in the simulation (Figure 4B). For further analysis, we used the 99<sup>th</sup> percentile score of the  
269 simulation as a threshold for selecting inverted residues in the real dataset (Supplementary table  
270 1, Supplementary figure 2). In summary, the simulated evolution experiment provided a score  
271 threshold for detecting residue inversions and confirmed the low chance of this event in the  
272 fish EGFR dataset, as observed in the theoretical model.

273

### 274 **Tree bootstrap**

275 We characterized the phylogenetic information carried by the residue inversions when  
276 reconstructing the correct fish EGFR phylogeny tree structure. First, we computed a  
277 phylogenetic tree using the sub-alignment of 19 inverted residue sites that score higher than  
278 the 99<sup>th</sup> percentile in the simulated evolution experiment (Supplementary figure 3). In this

279 phylogenetic tree, we can still see two defined groups of sequences corresponding to the two  
280 copies of EGFR. Though, as expected, all the sequences from Cypriniformes EGFRa cluster  
281 together with the EGFRb group, and vice versa the Cypriniformes EGFRb cluster in the EGFRa  
282 group. When we compared this tree to the full-alignment tree, we calculated a similarity value  
283 of 74.84 out of 165 using the tree similarity score of Nye *et al.* (50). Next, we generated a pool  
284 of bootstrap trees with a reduced alignment length, and we checked their similarity to the full  
285 alignment and the inverted residue trees (Figure 4C). We observed a decrease in tree similarity  
286 to the full tree proportional to the decrease in alignment length. However, the inverted residue  
287 tree distance is statistically less similar to the full alignment tree than the bootstraps, even  
288 among the bootstraps with an equivalent length of 20 residues (student t-test p-value: 0.0019).  
289 This result suggests that the inverted residues are just a minority of the sites in the alignment  
290 and that they disperse the phylogenetic information faster than the average. This view is  
291 compatible with the hypothesis that a few functional mutations are hidden behind an  
292 overwhelming amount of neutral or nearly-neutral variants, complicating their detection.

293

#### 294 **Comparison of DIRphy inverted residues to Specificity Determining Sites (SDS)** 295 **prediction**

296 We predicted the SDS of fish EGFR using SPEER (32), and observed a marked difference in  
297 the type of identified positions compared to DIRphy. To compare the two methods, we defined  
298 a “matching probability” as the dot product of the amino acid emission probability vectors of  
299 two HMM models. Then, we compared, for each site of the fish EGFR alignment, the mean  
300 matching probability between HMM models of the orthologs (cypriniformes EGFRa to other  
301 fish EGFRa, and cypriniformes EGFRb to other fish EGFRb) with the mean matching  
302 probability between the paralogs (cypriniformes EGFRa to other fish EGFRb, and  
303 cypriniformes EGFRb to other fish EGFRa) (Figure 4D). From this analysis, it is evident that

304 SPEER tends to predict sites with a high ortholog-low paralog correlation. These sites are likely  
305 to possess a paralog-specific function. On the other hand, DIRphy identifies diametrically  
306 opposite sites, with a high paralog-low ortholog correlation. Both types of sites deviates from  
307 the diagonal, a pattern that suggests a functional adaptation. However, the sites that show an  
308 inversion are more challenging to identify for SDS predictions because, for a subset of species,  
309 the conservation pattern is inverted, and the signal is averaged out. In summary, the  
310 identification of residue inversion event has the potential to improve functional residue  
311 predictions, as DIRphy is able to identify functional sites that are overlooked by SDS prediction  
312 methods.



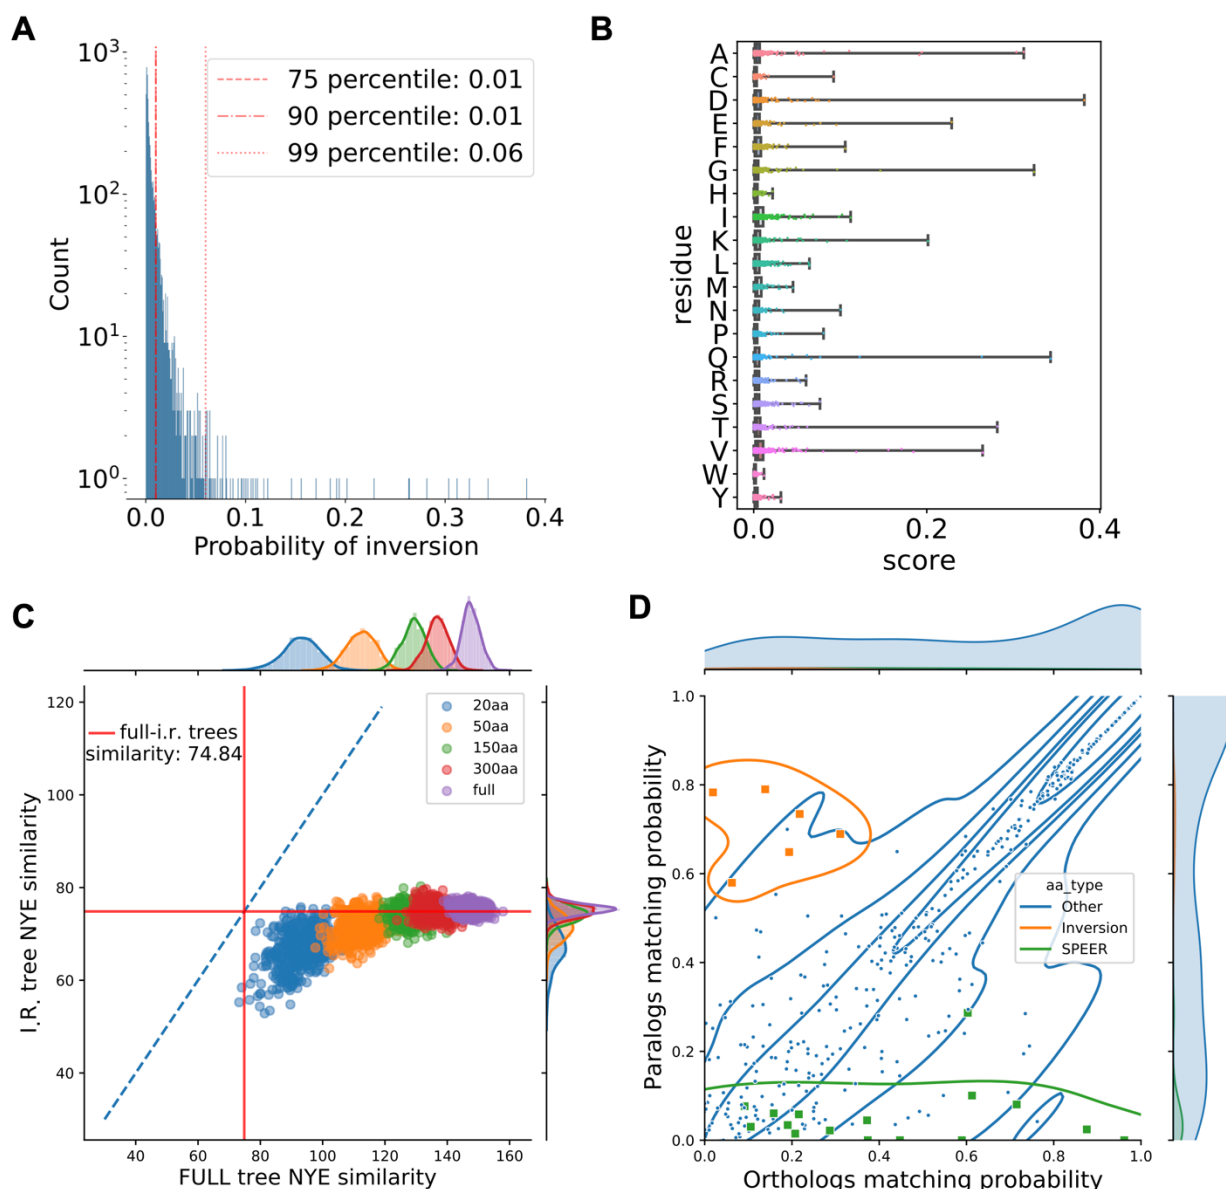

313

314 **Figure 4. Outcome to the validations. (A)** Distribution of the simulated evolution DIRphy

315 scores. A 5000 random amino acid sequence was evolved through the fish EGFR

316 phylogenetic tree using the same evolutionary models used to generate the tree. The resulting

317 MSA was used to compute the DIRphy score. **(B)** Distribution per amino acid of the

318 simulated evolution DIRphy scores as shown by the reference (*S. anshuiensis* EGFRa). **(C)**

319 Bootstrap trees similarity to the full and inverted residue trees. The color represents the

320 length of the sub-alignment used to generate the bootstrap tree. The red line shows the

321 similarity between the full and inverted residue trees. The blue line is the identity line. **(D)**

322 Comparison of the sites identified by DIRphy and SPEER. The matching probability of the  
323 HMM of four sub-alignments was used to compare between species the orthologs (EGFRa vs  
324 EGFRa, EGFRb vs EGFRb) and paralogs (EGFRa vs EGFRb). The matching probability is  
325 calculated as the average of two dot products of the frequency arrays. The orange color  
326 shows sites where a residue inversion was identified, while the green color shows sites where  
327 the p-value of SPEER score is lower than 0.01.

328

## 329 **Conclusions**

330 In conclusion, we have detected an event in paralogs that lead to the inversion of functional  
331 residues. This new event has been described by a theoretical model and validated by literature  
332 and bioinformatics studies. To the best of our knowledge, we are the first to identify and  
333 describe the residue inversion event, possibly because this event might be rare. However,  
334 residue inversions are potentially exploited for functional divergence and, if missed, might  
335 lead to the wrong classification of proteins in the correct functional groups. We provide a  
336 general tool, named DIRphy, to identify residue inversions in a large protein dataset. DIRphy  
337 can be easily integrated in an existing pipeline of protein annotation to improve functional  
338 annotation and provide the positions that might have been overlooked by other functional site  
339 prediction methods.

340

## 341 **Materials and Methods**

342

### 343 **Theoretical model**

344 The model was built on the following assumptions: 1) equal branch length between the two  
345 paralogs:  $b_1 = b_2$ ,  $b_3 = b_4 = b_5 = b_6$ ; 2) only zero to one mutation can occur in each of the  
346 six branches; 3) after a mutation, each residue is equiprobable; 4) no selective pressure; 5) the

347 probability of a mutation on a branch solely depends on the branch length (mutation rate) and  
348 is  $P = 1 - e^{-\lambda}$  where P is the probability of a mutation and  $\lambda$  is the mutation rate.

349

350 Given the probability of a mutation in each of the six branches, we can calculate the  
351 probability of all the 64 ( $2^6$ ) configurations of mutations on the tree. A configuration  
352 unequivocally leads to a determined leaf node state (Supplementary figure 4). We defined the  
353 leaf node states with the allowed values zero, one, or two. The state value represents the  
354 number of mutations that happened in the branches connecting to the leaf node (Figure 1A).  
355 Then, we defined the probability of a match between leaf nodes based on the state value. The  
356 probabilities describe the situation in which a residue can mutate to one of 19 possible other  
357 residues. In some cases, the matching probability depends on the state of the ancestral node  
358 before speciation, e.g., a single or double mutation in the inner branch leaves. Finally, we  
359 defined seven categories based on the type of matching at the leaf nodes, and we defined their  
360 probability of occurrence based on the matching probabilities between leaf nodes.

361

### 362 **Model categories**

363 Here we give a brief description of the model categories and formulas used to calculate their  
364 probabilities in the model.

#### 365 Conserved

$$366 \quad P_{cons} = mi_{Xa,Ya} * mi_{Xb,Yb} * \max(mo_{Xa,Xb}, mo_{Xa,Yb}, mo_{Ya,Xb}, mo_{Ya,Yb})$$

367 Where *mi* stands for the inner match, *mo* stands for the outer match and corresponds to the  
368 probabilities of a match in figure 1B. The conserved category collects the states where a site  
369 is invariant in all four leaf nodes. It could arise from no mutations, but also from (two, three,  
370 or) four mutations to the same amino acid. In the formula, the maximum value of the outer

371 matches is used as the best approximation of the conditional probability of matching all leaf  
 372 nodes given the two inner matches.

373 Type 1 Divergence

$$\begin{aligned}
 374 \quad & P_{type1} = \\
 375 \quad & = mi_{Xa,Ya} * (1 - mi_{Xb,Yb}) * (1 - \min(mo_{Xa,Xb}, mo_{Ya,Xb})) * (1 - \min(mo_{Xa,Yb}, mo_{Ya,Yb})) \\
 376 \quad & + (1 - mi_{Xa,Ya}) * mi_{Xb,Yb} * (1 - \min(mo_{Xa,Xb}, mo_{Xa,Yb})) * (1 - \min(mo_{Ya,Xb}, mo_{Ya,Yb}))
 \end{aligned}$$

377 The type 1 divergence collects the states where the amino acid is matching between species  
 378 only in one paralog, while there is no match in the other paralog.

379 Type 2 Divergence

$$380 \quad P_{type2} = mi_{Xa,Ya} * mi_{Xb,Yb} * (1 - P_{cons})$$

381 The type 2 divergence collects the states where the two paralogs display a different amino  
 382 acid but are conserved between species. Type 1 and type 2 classifications are based on (51).

383 Recent Divergence

$$\begin{aligned}
 384 \quad & P_{recent} = sum(mi_{Xa,Ya} * mo_{Xa,Xb} * (1 - mo_{Xb,Yb}) \\
 385 \quad & \quad mi_{Xa,Ya} * mo_{Xa,Yb} * (1 - mo_{Xb,Yb}) \\
 386 \quad & \quad mi_{Xb,Yb} * mo_{Xa,Xb} * (1 - mo_{Xa,Ya}) \\
 387 \quad & \quad mi_{Xb,Yb} * mo_{Ya,Xb} * (1 - mo_{Xa,Ya}))
 \end{aligned}$$

388 The recent divergence collects the states where only one leaf node is different (diverged)  
 389 compared to the other three nodes.

390 Inversion / Specie-Specific Adaptation

$$391 \quad P_{inv} = mo_{Xa,Yb} * mo_{Xb,Ya} * (1 - \min(mi_{Xa,Ya}, mi_{Xb,Yb}))$$

392 And similarly,

$$393 \quad P_{ssa} = mo_{Xa,Xb} * mo_{Ya,Yb} * (1 - \min(mi_{Xa,Ya}, mi_{Xb,Yb}))$$

394 These two categories represent the states where the amino acid does not match between  
395 orthologs but matches between paralogs for the inversion or between species for the species-  
396 specific adaptation.

397

### 398 **Calculation of inverted residue score**

399 We devised a score to identify inverted residues in a phylogeny. The score was based on the  
400 probability of observing an inversion in the previously described model and calculated with  
401 the following steps: 1) Divide an MSA into four sub-alignments (two EGFR copies and two  
402 species groups). 2) Generate four amino acid frequency arrays, optionally normalized by  
403 pseudo-counts\*. 3) Calculate the probability of a match between two groups using the dot  
404 product of the frequency array. 4) Calculate the joint probability of inversion (or similarly for  
405 species-specific adaptation) from the conditional probabilities and the frequency array  
406 matching using the following formulas:

$$407 \quad P_{\overline{(M(Xa,Xb,Ya,Yb))|M(Xa,Yb),M(Ya,Xb)}} = \sum_i^{20} \frac{Xa[i] * Yb[i]}{M(Xa,Yb)} * \left(1 - \frac{Ya[i] * Xb[i]}{M(Ya,Xb)}\right)$$

$$408 \quad P_{\overline{(M(Xa,Xb,Ya,Yb),M(Xa,Yb),M(Ya,Xb))}}$$

$$409 \quad = P_{\overline{(M(Xa,Xb,Ya,Yb))|M(Xa,Yb),M(Ya,Xb)}} * M(Xa,Yb) * M(Ya,Xb)$$

410 Where  $Xa, Xb, Ya, Yb$  are the amino acid frequency arrays for the MSA sequence groups with  
411 the same names,  $i$  is the counter spanning each amino acid. The probability of a match (e.g.,  
412  $M(Xa, Yb)$ ) is given by the array dot product:  $M(Xa, Yb) = \sum_i^{20} Xa[i] * Yb[i]$ . The latter  
413 joined probability represents the inverted residue score.

414

### 415 **\* Pseudo-count normalization**

416 To correct any possible bias given by groups with a small number of species, we  
417 implemented a pseudo-count normalization of the amino acid frequency array, as previously

418 done in Tatsuov *et al.* (52). We used the LG protein substitution matrix (53) as background  
419 amino acid frequency probability. The value of the beta parameter for the pseudo-counts  
420 formula was set by default to five; however, it is possible to modify this parameter before  
421 running the pipeline.

422

### 423 **Fish dataset**

424 To test the inverted residue score, we generated a fish genome dataset. First, we downloaded  
425 all genomes from the European Nucleotide Archive (ENA) belonging to taxon 41665  
426 (Actinopterygii). Through this method, we obtained 88 fish genomes. Next, we downloaded  
427 the pre-annotated fish EGFR protein sequences from the ENSEMBL database (54) and used  
428 them to build an HMM profile with the HMMER package (55). The HMM profile was used  
429 as a query in Augustus package suite (56) to search for EGFR related genes in the fish  
430 genomes. We then filtered out interrupted CDS, sequences clustering with other ErbBs in a  
431 phylogenetic tree, and sequences with an aberrant branch length in the non-synonymous  
432 codon tree. After this procedure, we obtained 167 fish EGFR protein sequences.

433

### 434 **Phylogenetic analysis**

435 We performed the phylogenetic analysis of the fish EGFR protein sequences using MAFFT  
436 (57) to align the sequences, and IQTREE (58) with ModelFinder (59) to search for the best  
437 evolutionary model to generate the phylogenetic tree. To generate the synonymous tree, we  
438 used paml CODEML (60).

439

### 440 **Sequence and structure analysis**

441 The sequences and alignments were handled using Unipro Ugene (61). The protein structure  
442 images and analyses were performed with UCSF Chimera (62). The modelling of fish EGFR  
443 structures was performed using the SWISS-MODEL web server (63) and AlphaFold 2 (64).

444

#### 445 **Simulated evolution**

446 We ran a simulated evolution experiment using an in-house pipeline based on the Pyvolve  
447 python package (65). The pipeline simulated an evolutionary pathway of 5000 random amino  
448 acids on the fish EGFR phylogenetic tree, using the same model of evolution and  
449 evolutionary rates that were used to construct the tree (JTT with rate heterogeneity) (66-68).  
450 The simulation generated an output alignment that was used to run the DIRphy pipeline, to  
451 calculate the base probability of an inversion.

452

#### 453 **Bootstrap**

454 To perform the bootstrap, we used an in-house Matlab script. We selected from the fish  
455 EGFR DIRphy prediction the 19 sites with a score higher than the 99<sup>th</sup> percentile of the  
456 simulated evolution scores. We calculated a phylogenetic tree for the full alignment and the  
457 inverted residues alignment using the neighbor-joining algorithm (69) and the BLOSUM80  
458 matrix (70). The similarity distance between trees was calculated using the method described  
459 in Nye *et al.* (50). We then performed 500 bootstrap alignments for each set of alignment  
460 lengths: full, 250, 100, 20. We excluded columns with 90% or more gaps and repeated the  
461 sampling whenever one sequence did not have at least one non-gap position. For each  
462 bootstrap alignment, we generated a tree, then calculated the distance to the full tree and  
463 inverted residue tree.

464

465

466 **Declarations**

467 **Ethics approval and consent to participate**

468 Not applicable

469

470 **Consent for publication**

471 Not applicable

472

473 **Availability of data and materials**

474 The data and scripts used to support the conclusions of this article are available in the

475 DIRphy Github python repository: <https://zenodo.org/badge/latestdoi/346201641>.

476

477 **Competing interests**

478 The authors declare no competing financial interests.

479

480 **Funding**

481 Funding support by the Okinawa Institute of Science and Technology to P.L. is gratefully

482 acknowledged.

483

484 **Author contributions**

485 S.P. and P.L. designed the project. S.P. performed the research. S.P. and P.L. analyzed the

486 data and wrote the manuscript.

487

488 **Acknowledgments**

489 We thank Federica di Palma, Tarang K. Mehta, and Wilfried Haerty for the thoughtful

490 discussions on fish phylogeny. Stanisław Dunin-Horkawicz and Dan Kozome for critical



491 reading of the manuscript. We are grateful for the help and support provided by the Scientific  
492 Computing and Data Analysis section of Research Support Division at OIST. Financial  
493 support by the Okinawa Institute of Science and Technology to P.L. is gratefully  
494 acknowledged.

495

## 496 **References**

- 497 1. Ashkenazy H, Abadi S, Martz E, Chay O, Mayrose I, Pupko T, et al. ConSurf 2016:  
498 an improved methodology to estimate and visualize evolutionary conservation in  
499 macromolecules. *Nucleic Acids Res.* 2016;44(W1):W344-W50.
- 500 2. Sankararaman S, Kolaczowski B, Sjölander K. INTREPID: a web server for  
501 prediction of functionally important residues by evolutionary analysis. *Nucleic Acids Res.*  
502 2009;37(Web Server issue):W390-5.
- 503 3. Wilkins AD, Bachman BJ, Erdin S, Lichtarge O. The use of evolutionary patterns in  
504 protein annotation. *Curr Opin Struct Biol.* 2012;22(3):316-25.
- 505 4. Kimura M. The neutral theory of molecular evolution: a review of recent evidence.  
506 *Jpn J Genet.* 1991;66(4):367-86.
- 507 5. Rockah-Shmuel L, Tóth-Petróczy Á, Tawfik DS. Systematic Mapping of Protein  
508 Mutational Space by Prolonged Drift Reveals the Deleterious Effects of Seemingly Neutral  
509 Mutations. *PLoS Comput Biol.* 2015;11(8):e1004421.
- 510 6. Lee D, Redfern O, Orengo C. Predicting protein function from sequence and  
511 structure. *Nat Rev Mol Cell Biol.* 2007;8(12):995-1005.
- 512 7. Mitchell MB. ABERRANT RECOMBINATION OF PYRIDOXINE MUTANTS OF  
513 *Neurospora*. *Proc Natl Acad Sci U S A.* 1955;41(4):215-20.

- 514 8. Mallik S, Tawfik DS. Determining the interaction status and evolutionary fate of  
515 duplicated homomeric proteins. *PLoS Comput Biol.* 2020;16(8):e1008145.
- 516 9. Gout JF, Lynch M. Maintenance and Loss of Duplicated Genes by Dosage  
517 Subfunctionalization. *Mol Biol Evol.* 2015;32(8):2141-8.
- 518 10. Huerta-Cepas J, Dopazo J, Huynen MA, Gabaldón T. Evidence for short-time  
519 divergence and long-time conservation of tissue-specific expression after gene duplication.  
520 *Brief Bioinform.* 2011;12(5):442-8.
- 521 11. Zhang J. Evolution by gene duplication: an update. *Trends in Ecology & Evolution.*  
522 2003;18(6):292-8.
- 523 12. Innan H, Kondrashov F. The evolution of gene duplications: classifying and  
524 distinguishing between models. *Nature Reviews Genetics.* 2010;11(2):97-108.
- 525 13. McClintock JM, Kheirbek MA, Prince VE. Knockdown of duplicated zebrafish *hoxb1*  
526 genes reveals distinct roles in hindbrain patterning and a novel mechanism of duplicate gene  
527 retention. *Development.* 2002;129(10):2339-54.
- 528 14. Chakraborty A, Chakrabarti S. A survey on prediction of specificity-determining sites  
529 in proteins. *Briefings in Bioinformatics.* 2014;16(1):71-88.
- 530 15. Casari G, Sander C, Valencia A. A method to predict functional residues in proteins.  
531 *Nat Struct Biol.* 1995;2(2):171-8.
- 532 16. Lichtarge O, Bourne HR, Cohen FE. An evolutionary trace method defines binding  
533 surfaces common to protein families. *J Mol Biol.* 1996;257(2):342-58.

- 534 17. Panchenko AR, Kondrashov F, Bryant S. Prediction of functional sites by analysis of  
535 sequence and structure conservation. *Protein Sci.* 2004;13(4):884-92.
- 536 18. Mirny LA, Gelfand MS. Using Orthologous and Paralogous Proteins to Identify  
537 Specificity-determining Residues in Bacterial Transcription Factors. *J Mol Biol.*  
538 2002;321(1):7-20.
- 539 19. Fischer JD, Mayer CE, Söding J. Prediction of protein functional residues from  
540 sequence by probability density estimation. *Bioinformatics.* 2008;24(5):613-20.
- 541 20. Hannehalli SS, Russell RB. Analysis and prediction of functional sub-types from  
542 protein sequence alignments. *J Mol Biol.* 2000;303(1):61-76.
- 543 21. Kalinina OV, Mironov AA, Gelfand MS, Rakhmaninova AB. Automated selection of  
544 positions determining functional specificity of proteins by comparative analysis of  
545 orthologous groups in protein families. *Protein Sci.* 2004;13(2):443-56.
- 546 22. Reva B, Antipin Y, Sander C. Determinants of protein function revealed by  
547 combinatorial entropy optimization. *Genome Biol.* 2007;8(11):R232.
- 548 23. Wuster A, Venkatakrisnan AJ, Schertler GF, Babu MM. Spial: analysis of subtype-  
549 specific features in multiple sequence alignments of proteins. *Bioinformatics.*  
550 2010;26(22):2906-7.
- 551 24. Abhiman S, Sonnhammer EL. Large-scale prediction of function shift in protein  
552 families with a focus on enzymatic function. *Proteins.* 2005;60(4):758-68.
- 553 25. Gu X, Zou Y, Su Z, Huang W, Zhou Z, Arendsee Z, et al. An update of DIVERGE  
554 software for functional divergence analysis of protein family. *Mol Biol Evol.*  
555 2013;30(7):1713-9.

- 556 26. Capra JA, Singh M. Characterization and prediction of residues determining protein  
557 functional specificity. *Bioinformatics*. 2008;24(13):1473-80.
- 558 27. Amitai G, Shemesh A, Sitbon E, Shklar M, Netanel D, Venger I, et al. Network  
559 analysis of protein structures identifies functional residues. *J Mol Biol*. 2004;344(4):1135-46.
- 560 28. Wicker N, Perrin GR, Thierry JC, Poch O. Secator: a program for inferring protein  
561 subfamilies from phylogenetic trees. *Mol Biol Evol*. 2001;18(8):1435-41.
- 562 29. Storm CE, Sonnhammer EL. Automated ortholog inference from phylogenetic trees  
563 and calculation of orthology reliability. *Bioinformatics*. 2002;18(1):92-9.
- 564 30. Zmasek CM, Eddy SR. RIO: analyzing proteomes by automated phylogenomics using  
565 resampled inference of orthologs. *BMC Bioinformatics*. 2002;3:14.
- 566 31. Li L, Stoeckert CJ, Jr., Roos DS. OrthoMCL: identification of ortholog groups for  
567 eukaryotic genomes. *Genome Res*. 2003;13(9):2178-89.
- 568 32. Chakraborty A, Mandloi S, Lanczycki CJ, Panchenko AR, Chakrabarti S. SPEER-  
569 SERVER: a web server for prediction of protein specificity determining sites. *Nucleic Acids*  
570 *Res*. 2012;40(Web Server issue):W242-8.
- 571 33. Tatusov RL, Koonin EV, Lipman DJ. A genomic perspective on protein families.  
572 *Science*. 1997;278(5338):631-7.
- 573 34. Dolinski K, Botstein D. Orthology and functional conservation in eukaryotes. *Annu*  
574 *Rev Genet*. 2007;41:465-507.
- 575 35. Oda K, Matsuoka Y, Funahashi A, Kitano H. A comprehensive pathway map of  
576 epidermal growth factor receptor signaling. *Mol Syst Biol*. 2005;1:2005.0010.

- 577 36. Yano S, Kondo K, Yamaguchi M, Richmond G, Hutchison M, Wakeling A, et al.  
578 Distribution and function of EGFR in human tissue and the effect of EGFR tyrosine kinase  
579 inhibition. *Anticancer Res.* 2003;23(5a):3639-50.
- 580 37. Hubbard SR, Miller WT. Receptor tyrosine kinases: mechanisms of activation and  
581 signaling. *Curr Opin Cell Biol.* 2007;19(2):117-23.
- 582 38. Amores A, Suzuki T, Yan YL, Pomeroy J, Singer A, Amemiya C, et al.  
583 Developmental roles of pufferfish Hox clusters and genome evolution in ray-fin fish.  
584 *Genome Res.* 2004;14(1):1-10.
- 585 39. Meyer A, Van de Peer Y. From 2R to 3R: evidence for a fish-specific genome  
586 duplication (FSGD). *Bioessays.* 2005;27(9):937-45.
- 587 40. Lorin T, Brunet FG, Laudet V, Volff JN. Teleost Fish-Specific Preferential Retention  
588 of Pigmentation Gene-Containing Families After Whole Genome Duplications in  
589 Vertebrates. *G3 (Bethesda).* 2018;8(5):1795-806.
- 590 41. Laisney J, Braasch I, Walter RB, Meierjohann S, Scharl M. Lineage-specific co-  
591 evolution of the Egf receptor/ligand signaling system. *BMC Evol Biol.* 2010;10:16.
- 592 42. Bergthorsson U, Andersson DI, Roth JR. Ohno's dilemma: evolution of new genes  
593 under continuous selection. *Proc Natl Acad Sci U S A.* 2007;104(43):17004-9.
- 594 43. Leinonen R, Akhtar R, Birney E, Bower L, Cerdeno-Tárraga A, Cheng Y, et al. The  
595 European Nucleotide Archive. *Nucleic Acids Res.* 2011;39(Database issue):D28-31.
- 596 44. Macqueen DJ, Johnston IA. A well-constrained estimate for the timing of the  
597 salmonid whole genome duplication reveals major decoupling from species diversification.  
598 *Proc Biol Sci.* 2014;281(1778):20132881.

- 599 45. Wang JT, Li JT, Zhang XF, Sun XW. Transcriptome analysis reveals the time of the  
600 fourth round of genome duplication in common carp (*Cyprinus carpio*). *BMC Genomics*.  
601 2012;13:96.
- 602 46. Tadaki DK, Niyogi SK. The functional importance of hydrophobicity of the tyrosine  
603 at position 13 of human epidermal growth factor in receptor binding. *The Journal of*  
604 *biological chemistry*. 1993;268(14):10114-9.
- 605 47. Gomez A, Volff JN, Hornung U, Scharf M, Wellbrock C. Identification of a second  
606 *egfr* gene in *Xiphophorus* uncovers an expansion of the epidermal growth factor receptor  
607 family in fish. *Mol Biol Evol*. 2004;21(2):266-75.
- 608 48. Ogiso H, Ishitani R, Nureki O, Fukai S, Yamanaka M, Kim JH, et al. Crystal structure  
609 of the complex of human epidermal growth factor and receptor extracellular domains. *Cell*.  
610 2002;110(6):775-87.
- 611 49. Tareen A, Kinney JB. Logomaker: beautiful sequence logos in Python.  
612 *Bioinformatics*. 2020;36(7):2272-4.
- 613 50. Nye TM, Liò P, Gilks WR. A novel algorithm and web-based tool for comparing two  
614 alternative phylogenetic trees. *Bioinformatics*. 2006;22(1):117-9.
- 615 51. Gu X. Maximum-likelihood approach for gene family evolution under functional  
616 divergence. *Mol Biol Evol*. 2001;18(4):453-64.
- 617 52. Tatusov RL, Altschul SF, Koonin EV. Detection of conserved segments in proteins:  
618 iterative scanning of sequence databases with alignment blocks. *Proc Natl Acad Sci U S A*.  
619 1994;91(25):12091-5.

- 620 53. Le SQ, Gascuel O. An improved general amino acid replacement matrix. *Mol Biol*  
621 *Evol.* 2008;25(7):1307-20.
- 622 54. Zerbino DR, Achuthan P, Akanni W, Amode MR, Barrell D, Bhai J, et al. Ensembl  
623 2018. *Nucleic Acids Res.* 2018;46(D1):D754-d61.
- 624 55. Eddy SR. Accelerated Profile HMM Searches. *PLoS Comput Biol.*  
625 2011;7(10):e1002195.
- 626 56. Stanke M, Keller O, Gunduz I, Hayes A, Waack S, Morgenstern B. AUGUSTUS: ab  
627 initio prediction of alternative transcripts. *Nucleic Acids Res.* 2006;34(Web Server  
628 issue):W435-9.
- 629 57. Katoh K, Standley DM. MAFFT Multiple Sequence Alignment Software Version 7:  
630 Improvements in Performance and Usability. *Mol Biol Evol.* 2013;30(4):772-80.
- 631 58. Nguyen LT, Schmidt HA, von Haeseler A, Minh BQ. IQ-TREE: A Fast and Effective  
632 Stochastic Algorithm for Estimating Maximum-Likelihood Phylogenies. *Mol Biol Evol.*  
633 2015;32(1):268-74.
- 634 59. Kalyaanamoorthy S, Minh BQ, Wong TKF, von Haeseler A, Jermini LS.  
635 ModelFinder: fast model selection for accurate phylogenetic estimates. *Nat Methods.*  
636 2017;14(6):587-+.
- 637 60. Yang Z. PAML 4: phylogenetic analysis by maximum likelihood. *Mol Biol Evol.*  
638 2007;24(8):1586-91.
- 639 61. Okonechnikov K, Golosova O, Fursov M, team tU. Unipro UGENE: a unified  
640 bioinformatics toolkit. *Bioinformatics.* 2012;28(8):1166-7.

- 641 62. Goddard TD, Huang CC, Meng EC, Pettersen EF, Couch GS, Morris JH, et al. UCSF  
642 ChimeraX: Meeting modern challenges in visualization and analysis. *Protein Sci.*  
643 2018;27(1):14-25.
- 644 63. Waterhouse A, Bertoni M, Bienert S, Studer G, Tauriello G, Gumienny R, et al.  
645 SWISS-MODEL: homology modelling of protein structures and complexes. *Nucleic Acids*  
646 *Res.* 2018;46(W1):W296-W303.
- 647 64. Jumper J, Evans R, Pritzel A, Green T, Figurnov M, Ronneberger O, et al. Highly  
648 accurate protein structure prediction with AlphaFold. *Nature.* 2021;596(7873):583-9.
- 649 65. Spielman SJ, Wilke CO. Pyvolve: A Flexible Python Module for Simulating  
650 Sequences along Phylogenies. *PloS one.* 2015;10(9):e0139047.
- 651 66. Jones DT, Taylor WR, Thornton JM. The rapid generation of mutation data matrices  
652 from protein sequences. *Comput Appl Biosci.* 1992;8(3):275-82.
- 653 67. Yang Z. A space-time process model for the evolution of DNA sequences. *Genetics.*  
654 1995;139(2):993-1005.
- 655 68. Soubrier J, Steel M, Lee MS, Der Sarkissian C, Guindon S, Ho SY, et al. The  
656 influence of rate heterogeneity among sites on the time dependence of molecular rates. *Mol*  
657 *Biol Evol.* 2012;29(11):3345-58.
- 658 69. Saitou N, Nei M. The neighbor-joining method: a new method for reconstructing  
659 phylogenetic trees. *Mol Biol Evol.* 1987;4(4):406-25.
- 660 70. Henikoff S, Henikoff JG. Amino acid substitution matrices from protein blocks. *Proc*  
661 *Natl Acad Sci U S A.* 1992;89(22):10915-9.
- 662
